# Supplementary material
Source: PubMed Central journal article supplement (PMC9578419)
Supplement: jb.00138-22-s0001.pdf [file jb.00138-22-s0001.pdf]

**Supplementary Table S1.** Components of chemically defined media (CDM) for limiting *S. aureus* growth based on previous experiments for growing staphylococci slime production

| <b>Ingredients</b>                              | <b>Concentration (mg/L)</b> | <b>Concentration (mmol/L)</b> |
|-------------------------------------------------|-----------------------------|-------------------------------|
| <b>Group 1 (18 Amino acids)</b>                 |                             |                               |
| L- Alanine                                      | 100                         | 1.12                          |
| L- Arginine                                     | 100                         | 0.57                          |
| L- Aspartic acid                                | 150                         | 1.13                          |
| L- Cystine                                      | 50                          | 0.21                          |
| L- Glutamic acid                                | 150                         | 1.02                          |
| L- Glycine                                      | 100                         | 1.33                          |
| L- Histidine                                    | 100                         | 0.65                          |
| L- Isoleucine                                   | 150                         | 1.14                          |
| L- Leucine                                      | 150                         | 1.14                          |
| L- Lysine                                       | 100                         | 0.68                          |
| L- Methionine                                   | 100                         | 0.67                          |
| L- Phenylalanine                                | 100                         | 0.6                           |
| L- Proline                                      | 150                         | 1.3                           |
| L- Serine                                       | 100                         | 0.95                          |
| L- Threonine                                    | 150                         | 1.26                          |
| L- Tryptophan                                   | 100                         | 0.49                          |
| L- Tyrosine                                     | 100                         | 0.55                          |
| L- Valine                                       | 150                         | 1.28                          |
| <b>Group 2 (Glucose)</b>                        |                             |                               |
| Glucose                                         | 2500                        | 13.9                          |
| <b>Group 3 (Salts+minerals)</b>                 |                             |                               |
| MgSO <sub>4</sub>                               | 500                         | 4.15                          |
| Na <sub>2</sub> HPO <sub>4</sub>                | 10000                       | 70.44                         |
| KH <sub>2</sub> PO <sub>4</sub>                 | 3000                        | 22.04                         |
| CaCl <sub>2</sub>                               | 10                          | 0.09                          |
| MnCl <sub>2</sub>                               | 5                           | 0.04                          |
| (NH <sub>4</sub> ) <sub>2</sub> SO <sub>4</sub> | 6                           | 0.05                          |
| <b>Group 4 (Vitamins)</b>                       |                             |                               |
| Biotin                                          | 1                           | 0.004                         |
| Nicotinic acid                                  | 2                           | 0.016                         |
| D- Pantothenic acid, Ca salt                    | 2                           | 0.004                         |
| Pyridoxal                                       | 4                           | 0.016                         |
| Riboflavin                                      | 2                           | 0.005                         |
| Thiamin                                         | 2                           | 0.007                         |

$$(1) \quad \mu_{max} = 2.303 \left( \frac{\log_{10} N_2 - \log_{10} N_1}{t_1 - t_0} \right)$$

**Supplementary Equation S1.** Monods equation: the mathematical model which relates the growth rate of bacteria to the concentration of a limiting nutrient

$\mu_{max}$  = maximum growth rate ( $h^{-1}$ ),  $N$  = number of CFU at timepoint,  $t$  = timepoint (h)

$$(2) \quad T_g = \frac{\ln 2}{D}$$
$$D = \frac{F}{V}$$

**Supplementary Equation S2.** Derivations of equations for determining the parameters for continuous derivations of flowrate calculations. At steady state growth, the dilution rate is equal to the growth rate. The generation time and flowrate can be determined at a specific growth rate.

$T_g$  = generation time ( $h^{-1}$ ),  $\mu_{max}$  = maximum growth rate ( $h^{-1}$ ),  $D$  = dilution rate ( $h^{-1}$ ),  $F$  = flow rate ( $mL \cdot h^{-1}$ ),  $V$  = volume of vessel (mL),
